# Supplementary material for: Suppression of Vps13 adaptor protein mutants reveals a central role for PI4P in regulating prospore membrane extension
Source: PLOS journal article supplement (doi:10.1371/journal.pgen.1009727), 2021-08-18
Supplement: S3 (10.1371/journal.pgen.1009727.s003) [file journal.pgen.1009727.s003]

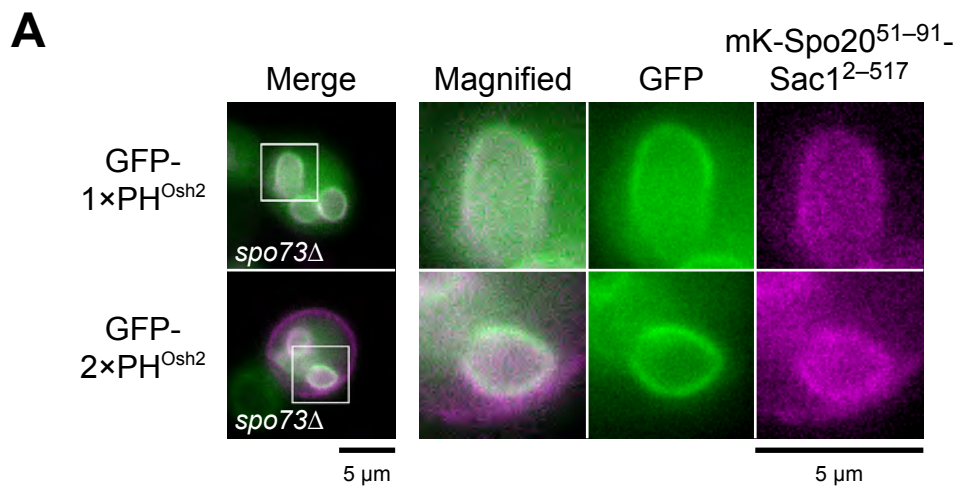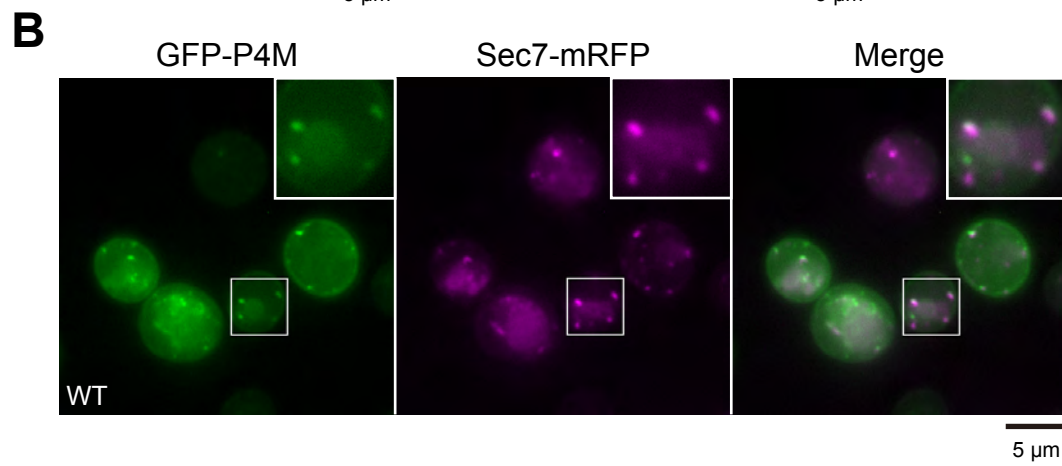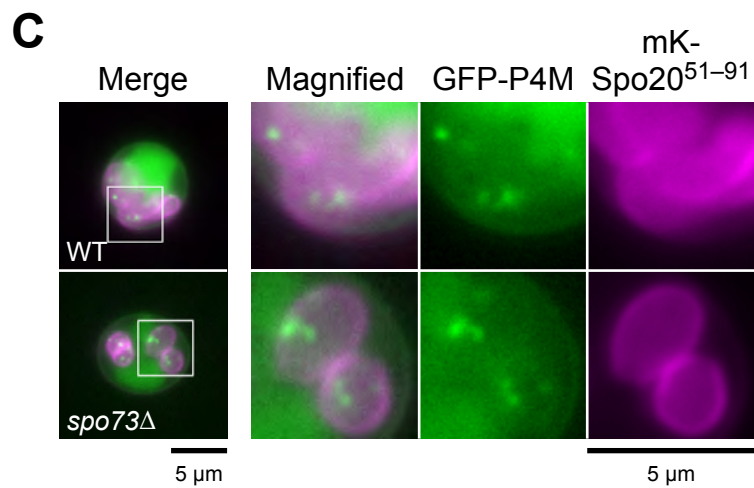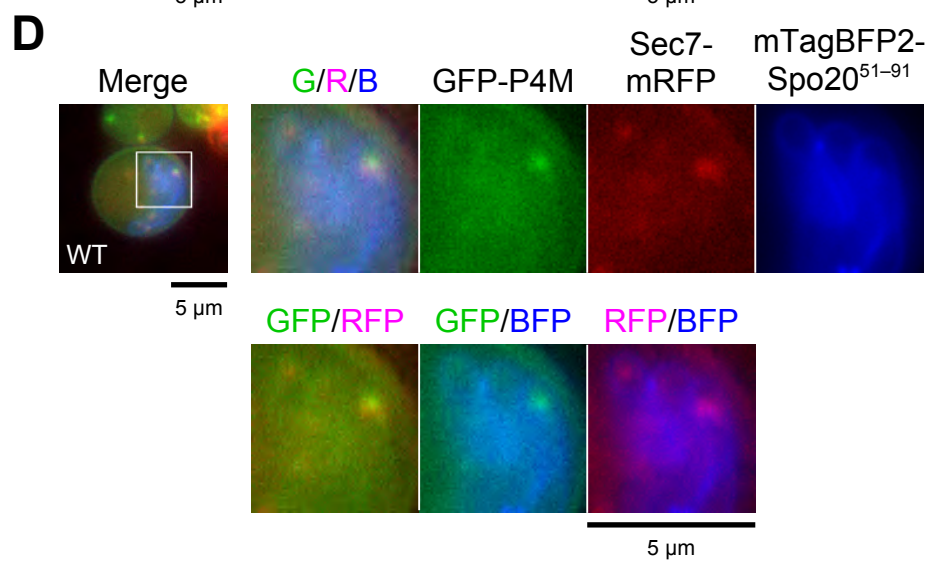

S3 Fig.

**S3 Fig. Changes in PI4P levels in the PSM can not be detected using conventional PI4P biomarkers.**

(A) Localization of GFP-1×PH<sup>Osh2</sup> (left) or GFP-2×PH<sup>Osh2</sup> (right) in *spo73Δ* (TC545) cells overproducing mKate2-Spo20<sup>51-91</sup>-Sac1<sup>2-517</sup> during PSM formation. (B) Localization of GFP-P4M in wild-type cells producing Sec7-mRFP (TNY643) during vegetative growth. Sec7-mRFP, a Golgi marker. (C) Localization of GFP-P4M in wild-type (AN120) and *spo73Δ* (TC545) cells during PSM formation. mKate2-Spo20<sup>51-91</sup>, a PSM marker. (D) Localization of GFP-P4M in wild-type cells producing Sec7-mRFP and mTagBFP2-Spo20<sup>51-91</sup> (TNY643) during PSM formation. Sec7, a Golgi marker. mTagBFP2-Spo20<sup>51-91</sup>, a PSM marker. mK, mKate2. Scale bar, 5 μm.
